# Supplementary material for: Evidence of nitrite acting as a stable and robust inducer of non-cultivability in Mycobacterium tuberculosis with physiological relevance
Source: PubMed Central journal article supplement (PMC6593118; doi:10.1038/s41598-019-45652-8), 2019-06-25

## Supplementary File

**Title: Evidence of nitrite acting as a stable and robust inducer of non-cultivability in *Mycobacterium tuberculosis* with physiological relevance**

**Authors:** Suwarna P Gample<sup>1,2</sup>, Sonia Agrawal<sup>1,2</sup>, Dhiman Sarkar<sup>1,2#</sup>

**Table S1: Genes up regulated in *M. tuberculosis* after 1 day of nitrite exposure**

| Ra_ID       | Probe Name | Gene Name      | GeoMean_1D | P-Value |
|-------------|------------|----------------|------------|---------|
| MRA_RS00705 | Rv3118     | <i>sseC1</i>   | 1.87       | 0.000   |
| MRA_RS00785 | Rv1854c    | <i>Ndh</i>     | 2.33       | 0.000   |
| MRA_RS04310 | Rv1197     | <i>esxK</i>    | 1.76       | 0.002   |
| MRA_RS04500 | Rv2256c    | <i>Rv2256c</i> | 1.69       | 0.002   |
| MRA_RS05725 | MTB000020  | <i>Rrl</i>     | 2.00       | 0.002   |
| MRA_RS01020 | Rv2617c    | <i>Rv2617c</i> | 3.54       | 0.000   |
| MRA_RS01030 | Rv2391     | <i>nirA</i>    | 1.58       | 0.000   |
| MRA_RS01135 | Rv2107     | <i>pe22</i>    | 1.88       | 0.000   |
| MRA_RS01180 | Rv3614c    | <i>Rv3614c</i> | 3.59       | 0.000   |
| MRA_RS08205 | Rv1980c    | <i>mpt64</i>   | 1.58       | 0.005   |
| MRA_RS01345 | Rv0896     | <i>gltA2</i>   | 1.52       | 0.000   |
| MRA_RS01470 | Rv3290c    | <i>lat</i>     | 2.84       | 0.001   |
| MRA_RS01530 | Rv0244c    | <i>fadE5</i>   | 1.94       | 0.001   |
| MRA_RS01535 | Rv1793     | <i>esxN</i>    | 1.83       | 0.001   |
| MRA_RS07910 | Rv3416     | <i>whiB3</i>   | 2.17       | 0.004   |
| MRA_RS01665 | Rv3871     | <i>Rv3871</i>  | 2.56       | 0.001   |
| MRA_RS02155 | Rv2392     | <i>cysH</i>    | 1.51       | 0.001   |

| <b>Ra_ID</b> | <b>Probe Name</b> | <b>Gene Name</b> | <b>GeoMean_1D</b> | <b>P-Value</b> |
|--------------|-------------------|------------------|-------------------|----------------|
| MRA_RS02195  | Rv3616c           | <i>Rv3616c</i>   | 3.72              | 0.001          |
| MRA_RS02435  | Rv3619c           | <i>esxI</i>      | 2.00              | 0.001          |
| MRA_RS05630  | Rv3914            | <i>trxC</i>      | 1.66              | 0.002          |
| MRA_RS05705  | Rv0188            | <i>Rv0188</i>    | 2.02              | 0.002          |
| MRA_RS02460  | Rv3053c           | <i>nrdH</i>      | 2.19              | 0.001          |
| MRA_RS02495  | Rv1198            | <i>esxL</i>      | 2.30              | 0.001          |
| MRA_RS02545  | Rv1435c           | <i>Rv1435c</i>   | 2.08              | 0.001          |
| MRA_RS02550  | Rv1405c           | <i>Rv1405c</i>   | 2.42              | 0.001          |
| MRA_RS02575  | Rv2108            | <i>ppe36</i>     | 1.55              | 0.001          |
| MRA_RS03320  | Rv2558            | <i>Rv2558</i>    | 1.55              | 0.001          |
| MRA_RS04005  | Rv3205c           | <i>Rv3205c</i>   | 1.69              | 0.001          |
| MRA_RS04010  | Rv2204c           | <i>Rv2204c</i>   | 1.56              | 0.001          |
| MRA_RS04145  | Rv2496c           | <i>pdhB</i>      | 2.01              | 0.001          |
| MRA_RS04180  | Rv0129c           | <i>fbpC</i>      | 2.59              | 0.001          |
| MRA_RS04745  | Rv2590            | <i>fadD9</i>     | 2.84              | 0.002          |
| MRA_RS04790  | Rv3620c           | <i>esxM</i>      | 1.74              | 0.002          |
| MRA_RS04920  | Rv1076            | <i>lipU</i>      | 1.52              | 0.002          |
| MRA_RS04925  | Rv1925            | <i>fadD31</i>    | 1.51              | 0.002          |
| MRA_RS04935  | Rv3251c           | <i>rubA</i>      | 4.69              | 0.002          |
| MRA_RS06140  | Rv3249c           | <i>Rv3249c</i>   | 4.02              | 0.002          |
| MRA_RS06185  | Rv3250c           | <i>rub</i>       | 4.60              | 0.002          |
| MRA_RS06360  | Rv3045            | <i>adhC</i>      | 2.10              | 0.003          |
| MRA_RS07775  | Rv3241c           | <i>Rv3241c</i>   | 2.37              | 0.004          |
| MRA_RS06370  | Rv3054c           | <i>Rv3054c</i>   | 3.03              | 0.003          |

| <b>Ra_ID</b> | <b>Probe Name</b> | <b>Gene Name</b> | <b>GeoMean_1D</b> | <b>P-Value</b> |
|--------------|-------------------|------------------|-------------------|----------------|
| MRA_RS06375  | Rv3289c           | <i>Rv3289c</i>   | 2.54              | 0.003          |
| MRA_RS07780  | Rv1698            | <i>Rv1698</i>    | 1.52              | 0.004          |
| MRA_RS06495  | Rv2620c           | <i>Rv2620c</i>   | 1.59              | 0.003          |
| MRA_RS06895  | Rv0485            | <i>Rv0485</i>    | 2.43              | 0.003          |
| MRA_RS06930  | Rv3248c           | <i>sahH</i>      | 2.27              | 0.003          |
| MRA_RS07150  | Rv2347c           | <i>esxJ</i>      | 1.79              | 0.003          |
| MRA_RS08460  | Rv0928            | <i>pstS3</i>     | 2.04              | 0.005          |
| MRA_RS07315  | MRA_2676          | -                | 1.88              | 0.003          |
| MRA_RS07405  | Rv0491            | <i>regX3</i>     | 1.80              | 0.003          |
| MRA_RS07435  | Rv3615c           | <i>Rv3615c</i>   | 3.59              | 0.003          |
| MRA_RS07470  | Rv1221            | <i>sigE</i>      | 1.89              | 0.003          |
| MRA_RS07500  | Rv1697            | <i>Rv1697</i>    | 1.77              | 0.003          |
| MRA_RS07540  | Rv0211            | <i>pckA</i>      | 2.08              | 0.004          |
| MRA_RS07790  | Rv2393            | <i>Rv2393</i>    | 2.03              | 0.004          |
| MRA_RS07800  | Rv2927c           | <i>Rv2927c</i>   | 2.10              | 0.004          |
| MRA_RS08665  | Rv0467            | <i>icl</i>       | 2.27              | 0.005          |
| MRA_RS08970  | Rv1544            | <i>Rv1544</i>    | 1.67              | 0.005          |
| MRA_RS08975  | Rv3613c           | <i>Rv3613c</i>   | 1.99              | 0.005          |
| MRA_RS09685  | Rv2619c           | <i>Rv2619c</i>   | 1.89              | 0.006          |
| MRA_RS09465  | Rv2334            | <i>cysK1</i>     | 1.57              | 0.005          |
| MRA_RS09485  | Rv0251c           | <i>hsp</i>       | 1.50              | 0.005          |
| MRA_RS09495  | Rv0140            | <i>Rv0140</i>    | 2.81              | 0.006          |
| MRA_RS09515  | Rv2780            | <i>ald</i>       | 3.14              | 0.006          |
| MRA_RS11690  | Rv2428            | <i>ahpC</i>      | 1.82              | 0.008          |

| <b>Ra_ID</b> | <b>Probe Name</b> | <b>Gene Name</b> | <b>GeoMean_1D</b> | <b>P-Value</b> |
|--------------|-------------------|------------------|-------------------|----------------|
| MRA_RS11980  | Rv2707            | <i>Rv2707</i>    | 2.14              | 0.008          |
| MRA_RS11465  | Rv1072            | <i>Rv1072</i>    | 1.55              | 0.008          |
| MRA_RS09820  | Rv3052c           | <i>nrdI</i>      | 2.22              | 0.006          |
| MRA_RS09950  | Rv1195            | <i>pe13</i>      | 1.87              | 0.006          |
| MRA_RS10020  | Rv2499c           | <i>Rv2499c</i>   | 1.74              | 0.006          |
| MRA_RS10040  | Rv1894c           | <i>Rv1894c</i>   | 2.03              | 0.006          |
| MRA_RS10165  | Rv1466            | <i>Rv1466</i>    | 1.96              | 0.006          |
| MRA_RS10175  | Rv0815c           | <i>cysA2</i>     | 1.56              | 0.006          |
| MRA_RS11165  | Rv2202c           | <i>adoK</i>      | 2.12              | 0.007          |
| MRA_RS11170  | Rv3252c           | <i>alkB</i>      | 3.43              | 0.007          |
| MRA_RS11205  | Rv3463            | <i>Rv3463</i>    | 3.15              | 0.007          |
| MRA_RS11585  | Rv3810            | <i>pirG</i>      | 1.89              | 0.008          |
| MRA_RS12345  | Rv2466c           | <i>Rv2466c</i>   | 1.95              | 0.009          |
| MRA_RS12935  | Rv2710            | <i>sigB</i>      | 1.94              | 0.010          |
| MRA_RS12475  | Rv3051c           | <i>nrdE</i>      | 2.07              | 0.009          |
| MRA_RS13135  | Rv2621c           | <i>Rv2621c</i>   | 2.23              | 0.010          |
| MRA_RS12710  | Rv0784            | <i>Rv0784</i>    | 2.00              | 0.009          |
| MRA_RS13315  | Rv2115c           | <i>Rv2115c</i>   | 2.00              | 0.011          |
| MRA_RS14145  | Rv1577c           | <i>Rv1577c</i>   | 1.56              | 0.013          |
| MRA_RS14195  | Rv0464c           | <i>Rv0464c</i>   | 1.66              | 0.013          |
| MRA_RS13675  | Rv1987            | <i>Rv1987</i>    | 1.60              | 0.012          |
| MRA_RS14400  | Rv1461            | <i>Rv1461</i>    | 2.99              | 0.014          |
| MRA_RS16230  | Rv1196            | <i>ppe18</i>     | 1.55              | 0.018          |

| <b>Ra_ID</b> | <b>Probe Name</b> | <b>Gene Name</b> | <b>GeoMean_1D</b> | <b>P-Value</b> |
|--------------|-------------------|------------------|-------------------|----------------|
| MRA_RS14420  | Rv2662            | <i>Rv2662</i>    | 1.54              | 0.015          |
| MRA_RS16240  | Rv2160c           | <i>Rv2160c</i>   | 1.73              | 0.018          |
| MRA_RS14435  | Rv1880c           | <i>cyp140</i>    | 1.99              | 0.015          |
| MRA_RS04305  | Rv0309            | <i>Rv0309</i>    | 1.51              | 0.019          |
| MRA_RS17060  | Rv1463            | <i>Rv1463</i>    | 2.49              | 0.020          |
| MRA_RS17145  | Rv1375            | <i>Rv1375</i>    | 2.26              | 0.021          |
| MRA_RS17305  | Rv1464            | <i>csd</i>       | 1.90              | 0.022          |
| MRA_RS17345  | Rv3086            | <i>adhD</i>      | 1.57              | 0.022          |
| MRA_RS17290  | Rv1462            | <i>Rv1462</i>    | 2.26              | 0.022          |
| MRA_RS17295  | Rv0146            | <i>Rv0146</i>    | 1.57              | 0.022          |
| MRA_RS18185  | Rv1419            | <i>Rv1419</i>    | 1.53              | 0.024          |
| MRA_RS20205  | Rv0287            | <i>esxG</i>      | 1.84              | 0.048          |
| MRA_RS19155  | Rv0288            | <i>esxH</i>      | 1.80              | 0.026          |
| MRA_RS20505  | MTB000026         | <i>rnpB</i>      | 2.45              | 0.049          |
| MRA_RS17485  | Rv3206c           | <i>moeB1</i>     | 1.61              | 0.023          |
| MRA_RS19185  | Rv0848            | <i>cysK2</i>     | 1.51              | 0.029          |
|              | Rv3874            | <i>esxB</i>      | 1.66              | 0.065          |
|              | Rv3161c           | <i>Rv3161c</i>   | 1.56              | 0.068          |
|              | Rv3019c           | <i>esxR</i>      | 1.53              | 0.086          |

**Table S2: Genes down regulated in *M. tuberculosis* after 1 day of nitrite exposure**

| <b>Ra_ID</b> | <b>Probe Name</b> | <b>Gene Name</b> | <b>GeoMean_1D</b> | <b>P-Value</b> |
|--------------|-------------------|------------------|-------------------|----------------|
|--------------|-------------------|------------------|-------------------|----------------|

|             |         |              |       |       |
|-------------|---------|--------------|-------|-------|
| MRA_RS19190 | Rv3621c | <i>ppe65</i> | -1.59 | 0.001 |
| MRA_RS01815 | Rv0342  | <i>iniA</i>  | -1.69 | 0.035 |

|             |         |                |       |       |
|-------------|---------|----------------|-------|-------|
| MRA_RS09625 | Rv1815  | <i>Rv1815</i>  | -1.90 | 0.037 |
| MRA_RS15885 | Rv2990c | <i>Rv2990c</i> | -1.50 | 0.006 |
| MRA_RS01495 | Rv0280  | <i>ppe3</i>    | -1.53 | 0.015 |
| MRA_RS00930 | Rv0171  | <i>mce1C</i>   | -1.56 | 0.025 |

**Table S3: Genes up regulated in *M. tuberculosis* after 3 day of nitrite exposure**

| <b>Ra_ID</b> | <b>Probe Name</b> | <b>Gene Name</b> | <b>GeoMean_1D</b> | <b>P-Value</b> |
|--------------|-------------------|------------------|-------------------|----------------|
| MRA_RS20415  | Rv3849            | <i>Rv3849</i>    | 4.80              | 0.000          |
| MRA_RS05945  | Rv1116            | <i>Rv1116</i>    | 1.52              | 0.001          |
| MRA_RS10920  | Rv2063            | <i>Rv2063</i>    | 2.70              | 0.001          |
| MRA_RS19640  | Rv3705A           | <i>Rv3705A</i>   | 2.33              | 0.002          |
| MRA_RS14445  | Rv2712c           | <i>Rv2712c</i>   | 1.48              | 0.002          |
| MRA_RS09350  | Rv1761c           | <i>Rv1761c</i>   | 4.41              | 0.005          |
| MRA_RS09355  | Rv1762c           | <i>Rv1762c</i>   | 5.07              | 0.012          |
| MRA_RS00615  | Rv0112            | <i>gca</i>       | 1.51              | 0.007          |
| MRA_RS09345  | Rv1760            | <i>Rv1760</i>    | 1.59              | 0.007          |
| MRA_RS14625  | Rv2748c           | <i>ftsK</i>      | 1.57              | 0.008          |
| MRA_RS20305  | Rv3828c           | <i>Rv3828c</i>   | 1.57              | 0.008          |
| MRA_RS16390  | Rv2564            | <i>glnQ</i>      | 1.99              | 0.008          |
| MRA_RS19220  | Rv3627c           | <i>Rv3627c</i>   | 1.50              | 0.009          |
| MRA_1990     |                   |                  | 1.74              | 0.010          |
| MRA_RS00370  | Rv0066c           | <i>icd2</i>      | 2.74              | 0.010          |
| MRA_RS06285  | Rv1179c           | <i>Rv1179c</i>   | 1.50              | 0.011          |
| MRA_RS12660  | Rv2382c           | <i>mbtC</i>      | 1.91              | 0.013          |

| <b>Ra_ID</b> | <b>Probe Name</b> | <b>Gene Name</b> | <b>GeoMean_1D</b> | <b>P-Value</b> |
|--------------|-------------------|------------------|-------------------|----------------|
| MRA_RS12450  | Rv2342            | <i>Rv2342</i>    | 1.80              | 0.019          |
| MRA_0412     |                   |                  | 2.45              | 0.020          |
| MRA_RS12620  | Rv2374c           | <i>hrcA</i>      | 1.55              | 0.016          |
| MRA_RS12605  | Rv2371            | <i>pe-pgrs40</i> | 2.11              | 0.016          |
| MRA_RS09545  | Rv0468            | <i>fadB2</i>     | 2.29              | 0.017          |
| MRA_RS08975  | Rv3613c           | <i>Rv3613c</i>   | 1.58              | 0.020          |
| MRA_RS12145  | Rv2290            | <i>lppO</i>      | 1.63              | 0.020          |
| MRA_RS16395  | Rv3084            | <i>lipR</i>      | 2.25              | 0.020          |
| MRA_RS18310  | Rv3448            | <i>Rv3448</i>    | 2.25              | 0.021          |
| MRA_RS13960  | Rv2159c           | <i>Rv2159c</i>   | 1.68              | 0.022          |
| MRA_RS03360  | Rv0636            | <i>Rv0636</i>    | 1.58              | 0.022          |
| MRA_RS07915  | Rv1489A           | <i>Rv1489A</i>   | 1.64              | 0.025          |
| MRA_RS10155  | Rv1921c           | <i>lppF</i>      | 1.90              | 0.025          |
| MRA_RS19515  | Rv3683            | <i>Rv3683</i>    | 1.93              | 0.025          |
| MRA_RS16995  | Rv3196A           | <i>Rv3196A</i>   | 2.05              | 0.025          |
| MRA_RS04265  | Rv0807            | <i>Rv0807</i>    | 1.61              | 0.037          |
| MRA_RS15115  | Rv2844            | <i>Rv2844</i>    | 1.79              | 0.027          |
| MRA_RS12830  | Rv2411c           | <i>Rv2411c</i>   | 1.55              | 0.027          |
| MRA_RS12380  | Rv2330c           | <i>lppP</i>      | 1.63              | 0.028          |
| MTB000010    |                   | <i>lysT</i>      | 4.21              | 0.028          |
| MRA_RS07975  | Rv1500            | <i>Rv1500</i>    | 1.62              | 0.030          |
| MRA_RS08015  | Rv1507A           | <i>Rv1507A</i>   | 1.69              | 0.038          |

| <b>Ra_ID</b> | <b>Probe Name</b> | <b>Gene Name</b> | <b>GeoMean_1D</b> | <b>P-Value</b> |
|--------------|-------------------|------------------|-------------------|----------------|
| MRA_RS13950  | MTB000019         | <i>rrs</i>       | 5.86              | 0.031          |
| MRA_RS11030  | Rv2082            | <i>Rv2082</i>    | 2.70              | 0.033          |
| MRA_RS19645  | Rv3706c           | <i>Rv3706c</i>   | 1.88              | 0.033          |
| MRA_RS03315  | Rv0631c           | <i>recC</i>      | 1.85              | 0.033          |
| MRA_RS03940  | Rv0747            | <i>pe-pgrs10</i> | 2.45              | 0.034          |
|              | Rv0192A           |                  | 2.28              | 0.036          |
| MRA_RS04570  | Rv0862c           | <i>Rv0862c</i>   | 2.24              | 0.040          |
| MRA_RS07425  | Rv1396c           | <i>pe-pgrs25</i> | 1.78              | 0.042          |
| MRA_RS03615  | Rv0685            | <i>tuf</i>       | 1.96              | 0.043          |
| MRA_RS07980  | Rv1501            | <i>Rv1501</i>    | 1.58              | 0.044          |
|              | MTB000028         | <i>metV</i>      | 3.82              | 0.046          |
| MRA_RS03145  | Rv0600c           | <i>Rv0600c</i>   | 2.21              | 0.046          |
| MRA_RS11855  | Rv2234            | <i>ptpA</i>      | 1.84              | 0.051          |
| MRA_RS04280  | Rv0810c           | <i>Rv0810c</i>   | 3.59              | 0.052          |
| MRA_RS15880  | Rv2989            | <i>Rv2989</i>    | 1.50              | 0.052          |
| MRA_RS04715  | Rv0891c           | <i>Rv0891c</i>   | 2.09              | 0.054          |
| MRA_RS05725  | MTB000020         | <i>rhl</i>       | 4.08              | 0.048          |
| MRA_RS09565  | Rv1803c           | <i>pe-pgrs32</i> | 1.54              | 0.044          |
| MRA_RS04840  | Rv0914c           | <i>Rv0914c</i>   | 2.46              | 0.045          |
| MRA_RS13550  | Rv2541            | <i>Rv2541</i>    | 1.77              | 0.045          |
| MRA_RS03425  | Rv0648            | <i>Rv0648</i>    | 2.49              | 0.057          |
| MRA_RS20390  | Rv3845            | <i>Rv3845</i>    | 1.79              | 0.051          |



| <b>Ra_ID</b> | <b>Probe Name</b> | <b>Gene Name</b> | <b>GeoMean_1D</b> | <b>P-Value</b> |
|--------------|-------------------|------------------|-------------------|----------------|
| MRA_RS16900  | Rv3180c           | <i>Rv3180c</i>   | 1.73              | 0.055          |
| MRA_RS01490  | Rv0279c           | <i>pe-pgrsS4</i> | 1.80              | 0.056          |
| MRA_RS18080  | Rv3403c           | <i>Rv3403c</i>   | 2.30              | 0.052          |
| MRA_RS18600  | Rv3507            | <i>pe-pgrs53</i> | 2.17              | 0.051          |
| MRA_RS15035  | Rv2828A           | <i>Rv2828A</i>   | 1.53              | 0.042          |
|              | Rv1053c           |                  | 1.63              | 0.044          |
| MRA_RS06305  | Rv1184c           | <i>Rv1184c</i>   | 2.02              | 0.045          |
| MRA_RS12015  | Rv2264c           | <i>Rv2264c</i>   | 2.42              | 0.047          |
| MRA_RS11045  | Rv2085            | <i>Rv2085</i>    | 1.52              | 0.038          |
| MRA_RS20340  | Rv3835            | <i>Rv3835</i>    | 1.53              | 0.034          |
|              | MTB000025         | <i>leuU</i>      | 2.74              | 0.029          |
| MRA_RS20405  | Rv2706c           | <i>Rv2706c</i>   | 1.67              | 0.021          |
| MRA_RS13830  | Rv2595            | <i>Rv2595</i>    | 1.84              | 0.031          |
| MRA_RS12250  | Rv2308            | <i>Rv2308</i>    | 1.62              | 0.004          |
| MRA_RS14955  | Rv2813            | <i>Rv2813</i>    | 2.36              | 0.012          |
| MRA_RS10885  | Rv2056c           | <i>rpsN2</i>     | 1.52              | 0.012          |
| MRA_RS19580  | Rv3695            | <i>Rv3695</i>    | 1.98              | 0.012          |
| MRA_RS12075  | Rv2276            | <i>cyp121</i>    | 1.92              | 0.010          |
| MRA_RS06535  | Rv1230c           | <i>Rv1230c</i>   | 2.00              | 0.014          |
| MRA_RS05780  | Rv1087            | <i>pe-pgrs21</i> | 1.52              | 0.014          |
| MRA_RS12340  | Rv1595            | <i>nadB</i>      | 1.99              | 0.014          |
| MRA_1587     |                   |                  | 1.59              | 0.015          |

| <b>Ra_ID</b> | <b>Probe Name</b> | <b>Gene Name</b> | <b>GeoMean_1D</b> | <b>P-Value</b> |
|--------------|-------------------|------------------|-------------------|----------------|
| MRA_RS05670  | Rv1065            | <i>Rv1065</i>    | 1.69              | 0.017          |
|              | Rv3344c           | <i>pe-pgrs49</i> | 1.62              | 0.017          |
|              | MTB000043         | <i>metU</i>      | 1.76              | 0.017          |
|              | MTB000003         | <i>leuT</i>      | 1.99              | 0.017          |
| MRA_RS03985  | Rv0755c           | <i>ppe12</i>     | 1.72              | 0.018          |
| MRA_RS13045  | Rv2450c           | <i>rpfE</i>      | 2.05              | 0.018          |
| MRA_RS14075  | Rv2641            | <i>cadI</i>      | 4.94              | 0.020          |
| MRA_RS12345  | Rv2466c           | <i>Rv2466c</i>   | 1.97              | 0.021          |
| MRA_RS04505  | Rv0849            | <i>Rv0849</i>    | 3.08              | 0.023          |
| MRA_RS20505  | MTB000026         | <i>rnpB</i>      | 3.33              | 0.024          |
| MRA_RS04495  | Rv0847            | <i>lpqS</i>      | 3.14              | 0.027          |
| MRA_RS15735  | Rv2963            | <i>Rv2963</i>    | 2.57              | 0.027          |
| MRA_RS13135  | Rv2621c           | <i>Rv2621c</i>   | 2.52              | 0.028          |
| MRA_RS14080  | Rv2642            | <i>Rv2642</i>    | 3.04              | 0.030          |
| MRA_RS19185  | Rv0848            | <i>cysK2</i>     | 3.74              | 0.032          |

**Table S4: Genes down regulated in *M. tuberculosis* after 3 day of nitrite exposure**

| <b>Ra_ID</b> | <b>Probe Name</b> | <b>Gene Name</b> | <b>GeoMean_1D</b> | <b>P-Value</b> |
|--------------|-------------------|------------------|-------------------|----------------|
| MRA_RS00060  | Rv0009            | <i>ppiA</i>      | -1.75             | 0.010          |
| MRA_RS19190  | Rv3621c           | <i>ppe65</i>     | -2.04             | 0.062          |
| MRA_RS03735  | Rv0707            | <i>rpsC</i>      | -1.81             | 0.015          |

| <b>Ra_ID</b> | <b>Probe Name</b> | <b>Gene Name</b> | <b>GeoMean_1D</b> | <b>P-Value</b> |
|--------------|-------------------|------------------|-------------------|----------------|
| MRA_RS07360  | Rv1384            | <i>carB</i>      | -1.76             | 0.014          |
| MRA_RS03720  | Rv0704            | <i>rplB</i>      | -1.70             | 0.002          |
| MRA_RS02435  | Rv3619c           | <i>esxI</i>      | -1.72             | 0.038          |
| MRA_RS02495  | Rv1198            | <i>esxL</i>      | -1.83             | 0.007          |
| MRA_RS02715  | Rv0516c           | <i>Rv0516c</i>   | -1.53             | 0.044          |
| MRA_RS03575  | Rv0677c           | <i>mmpS5</i>     | -1.91             | 0.007          |
| MRA_RS03655  | Rv0692            | <i>Rv0692</i>    | -1.99             | 0.081          |
| MRA_RS03700  | Rv0700            | <i>rpsJ</i>      | -2.27             | 0.062          |
| MRA_RS09970  | Rv1884c           | <i>rpfC</i>      | -1.61             | 0.055          |
| MRA_RS01305  | Rv0243            | <i>fadA2</i>     | -1.81             | 0.085          |
| MRA_RS04355  | Rv0824c           | <i>desA1</i>     | -1.79             | 0.012          |
| MRA_RS03710  | Rv0702            | <i>rplD</i>      | -1.83             | 0.011          |
| MRA_RS03705  | Rv0701            | <i>rplC</i>      | -1.78             | 0.019          |
| MRA_RS03810  | Rv0722            | <i>rpmD</i>      | -1.60             | 0.002          |
| MRA_RS00930  | Rv0171            | <i>mce1C</i>     | -1.77             | 0.036          |
| MRA_RS05355  | Rv1010            | <i>ksgA</i>      | -1.57             | 0.015          |
| MRA_RS18830  | Rv3549c           | <i>Rv3549c</i>   | -1.60             | 0.014          |
| MRA_RS19330  | Rv3648c           | <i>cspA</i>      | -1.97             | 0.002          |
| MRA_RS05835  | Rv1094            | <i>desA2</i>     | -1.82             | 0.035          |
| MRA_RS07235  | Rv1360            | <i>Rv1360</i>    | -1.91             | 0.029          |
| MRA_RS07315  | MRA_2676          | -                | -1.76             | 0.026          |
| MRA_RS16105  | Rv3029c           | <i>fixA</i>      | -2.10             | 0.002          |

| <b>Ra_ID</b> | <b>Probe Name</b> | <b>Gene Name</b> | <b>GeoMean_1D</b> | <b>P-Value</b> |
|--------------|-------------------|------------------|-------------------|----------------|
| MRA_RS18280  | Rv3442c           | <i>rpsI</i>      | -1.55             | 0.053          |
| MRA_RS18285  | Rv3443c           | <i>rplM</i>      | -1.57             | 0.036          |
| MRA_RS20370  | Rv3841            | <i>bfrB</i>      | -2.51             | 0.056          |
| MRA_RS20780  | Rv3922c           | <i>Rv3922c</i>   | -1.60             | 0.025          |
| MRA_RS20785  | Rv3923c           | <i>rnpA</i>      | -1.98             | 0.035          |
| MRA_RS09900  | Rv1870c           | <i>Rv1870c</i>   | -1.57             | 0.006          |
| MRA_RS09950  | Rv1195            | <i>pe13</i>      | -1.61             | 0.015          |
| MRA_RS09195  | Rv1738            | <i>Rv1738</i>    | -3.43             | 0.046          |
| MRA_RS03795  | Rv0719            | <i>rplF</i>      | -1.99             | 0.008          |
| MRA_RS07885  | Rv1484            | <i>inhA</i>      | -1.88             | 0.003          |
| MRA_RS10195  | Rv1929c           | <i>Rv1929c</i>   | -1.62             | 0.015          |
| MRA_RS09625  | Rv1815            | <i>Rv1815</i>    | -1.99             | 0.045          |
| MRA_RS10755  | Rv2031c           | <i>hspX</i>      | -1.78             | 0.006          |
| MRA_RS10760  | Rv2032            | <i>Acg</i>       | -2.04             | 0.036          |
| MRA_RS13910  | Rv2610c           | <i>pimA</i>      | -1.53             | 0.027          |
| MRA_RS13995  | Rv2626c           | <i>Rv2626c</i>   | -1.68             | 0.024          |
| MRA_RS14005  | Rv2628            | <i>Rv2628</i>    | -2.53             | 0.033          |
| MRA_RS12865  | Rv2418c           | <i>Rv2418c</i>   | -1.51             | 0.039          |
| MRA_RS17445  | Rv3280            | <i>accD5</i>     | -1.53             | 0.035          |
| MRA_RS17810  | Rv3351c           | <i>Rv3351c</i>   | -1.63             | 0.042          |
| MRA_RS00920  | Rv0169            | <i>mce1A</i>     | -1.99             | 0.025          |
| MRA_RS16230  | Rv1196            | <i>ppe18</i>     | -1.97             | 0.037          |

| <b>Ra_ID</b> | <b>Probe Name</b> | <b>Gene Name</b> | <b>GeoMean_1D</b> | <b>P-Value</b> |
|--------------|-------------------|------------------|-------------------|----------------|
|--------------|-------------------|------------------|-------------------|----------------|

|             |         |                |       |       |
|-------------|---------|----------------|-------|-------|
| MRA_RS16620 | Rv3127  | <i>Rv3127</i>  | -1.90 | 0.008 |
| MRA_RS16640 | Rv3130c | <i>Rv3130c</i> | -1.89 | 0.051 |
| MRA_RS16645 | Rv3131  | <i>Rv3131</i>  | -2.19 | 0.011 |

**Table S5: Genes up regulated in *M. tuberculosis* after 6 day of nitrite exposure**

| <b>Ra_ID</b> | <b>Probe Name</b> | <b>Gene Name</b> | <b>GeoMean_1D</b> | <b>P-Value</b> |
|--------------|-------------------|------------------|-------------------|----------------|
|--------------|-------------------|------------------|-------------------|----------------|

|             |         |                |      |       |
|-------------|---------|----------------|------|-------|
| MRA_RS01005 | Rv0186  | <i>bglS</i>    | 1.77 | 0.002 |
| MRA_RS01020 | Rv2617c | <i>Rv2617c</i> | 3.15 | 0.001 |
| MRA_RS04145 | Rv2496c | <i>pdhB</i>    | 1.60 | 0.003 |
| MRA_RS01470 | Rv3290c | <i>lat</i>     | 2.04 | 0.007 |
| MRA_RS05705 | Rv0188  | <i>Rv0188</i>  | 1.93 | 0.004 |
| MRA_RS01720 | Rv0323c | <i>Rv0323c</i> | 1.68 | 0.012 |
| MRA_RS10315 | Rv1952  | <i>Rv1952</i>  | 1.82 | 0.029 |
| MRA_RS05125 | Rv0968  | <i>Rv0968</i>  | 1.53 | 0.004 |
| MRA_RS09485 | Rv0251c | <i>hsp</i>     | 2.97 | 0.003 |
| MRA_RS06500 | Rv1223  | <i>htrA</i>    | 2.12 | 0.001 |
| MRA_RS09515 | Rv2780  | <i>ald</i>     | 1.77 | 0.010 |
| MRA_RS06370 | Rv3054c | <i>Rv3054c</i> | 3.10 | 0.003 |
| MRA_RS06375 | Rv3289c | <i>Rv3289c</i> | 1.82 | 0.011 |
| MRA_RS10095 | Rv1909c | <i>furA</i>    | 1.52 | 0.048 |
| MRA_RS10550 | Rv1992c | <i>ctpG</i>    | 2.83 | 0.008 |
| MRA_RS10555 | Rv1993c | <i>Rv1993c</i> | 1.54 | 0.010 |

| <b>Ra_ID</b> | <b>Probe Name</b> | <b>Gene Name</b> | <b>GeoMean_1D</b> | <b>P-Value</b> |
|--------------|-------------------|------------------|-------------------|----------------|
| MRA_RS14085  | Rv2643            | <i>arsC</i>      | 2.18              | 0.004          |
| MRA_RS14400  | Rv1461            | <i>Rv1461</i>    | 1.84              | 0.001          |
| MRA_RS17305  | Rv1464            | <i>csd</i>       | 1.66              | 0.003          |
| MRA_RS17495  | Rv1222            | <i>Rv1222</i>    | 2.03              | 0.006          |
| MRA_RS12935  | Rv2710            | <i>sigB</i>      | 2.94              | 0.023          |
| MRA_RS05725  | MTB000020         | <i>rrl</i>       | 1.59              | 0.058          |
| MRA_RS17060  | Rv1463            | <i>Rv1463</i>    | 1.74              | 0.000          |
| MRA_RS17155  | Rv3223c           | <i>sigh</i>      | 1.60              | 0.029          |
| MRA_RS17250  | Rv1955            | <i>Rv1955</i>    | 1.63              | 0.001          |
| MRA_RS20505  | MTB000026         | <i>rnpB</i>      | 1.72              | 0.005          |
| MRA_RS19580  | Rv3695            | <i>Rv3695</i>    | 1.75              | 0.040          |
| MRA_RS14075  | Rv2641            | <i>cadI</i>      | 3.33              | 0.003          |
| MRA_RS19185  | Rv0848            | <i>cysK2</i>     | 2.09              | 0.001          |

**Table S6: Genes down regulated in *M. tuberculosis* after 6 day of nitrite exposure**

| <b>Ra_ID</b> | <b>Probe Name</b> | <b>Gene Name</b> | <b>GeoMean_1D</b> | <b>P-Value</b> |
|--------------|-------------------|------------------|-------------------|----------------|
| MRA_RS11920  | Rv2245            | <i>kasA</i>      | -2.73             | 0.000          |
| MRA_RS11370  | Rv2144c           | <i>Rv2144c</i>   | -1.69             | 0.000          |
| MRA_RS01815  | Rv0342            | <i>iniA</i>      | -2.04             | 0.000          |
| MRA_RS03520  | Rv0667            | <i>rpoB</i>      | -2.08             | 0.000          |
| MRA_RS02435  | Rv3619c           | <i>esxI</i>      | -1.99             | 0.000          |
| MRA_RS07885  | Rv1484            | <i>inhA</i>      | -1.87             | 0.000          |

| <b>Ra_ID</b> | <b>Probe Name</b> | <b>Gene Name</b> | <b>GeoMean_1D</b> | <b>P-Value</b> |
|--------------|-------------------|------------------|-------------------|----------------|
| MRA_RS16105  | Rv3029c           | <i>fixA</i>      | -2.15             | 0.000          |
| MRA_RS20150  | Rv3799c           | <i>accD4</i>     | -1.57             | 0.000          |
| MRA_RS11915  | Rv2244            | <i>acpM</i>      | -2.67             | 0.000          |
| MRA_RS11925  | Rv2246            | <i>kasB</i>      | -2.23             | 0.000          |
| MRA_RS00060  | Rv0009            | <i>ppiA</i>      | -1.83             | 0.000          |
| MRA_RS04685  | Rv0885            | <i>Rv0885</i>    | -1.81             | 0.000          |
| MRA_RS08695  | Rv1641            | <i>infC</i>      | -2.01             | 0.001          |
| MRA_RS19190  | Rv3621c           | <i>ppe65</i>     | -1.69             | 0.001          |
| MRA_RS03700  | Rv0700            | <i>rpsJ</i>      | -2.48             | 0.002          |
| MRA_RS02495  | Rv1198            | <i>esxL</i>      | -2.04             | 0.001          |
| MRA_RS09690  | Rv1828            | <i>Rv1828</i>    | -1.51             | 0.001          |
| MRA_RS01810  | Rv0341            | <i>iniB</i>      | -3.75             | 0.001          |
| MRA_RS01535  | Rv1793            | <i>esxN</i>      | -1.96             | 0.001          |
| MRA_RS18105  | Rv3408            | <i>Rv3408</i>    | -1.97             | 0.001          |
| MRA_RS04790  | Rv3620c           | <i>esxM</i>      | -2.17             | 0.001          |
| MRA_RS02450  | Rv1827            | <i>cfp17</i>     | -1.59             | 0.001          |
| MRA_RS07150  | Rv2347c           | <i>esxJ</i>      | -2.28             | 0.001          |
| MRA_RS20785  | Rv3923c           | <i>rnpA</i>      | -2.13             | 0.001          |
| MRA_RS11175  | Rv2109c           | <i>prcA</i>      | -1.86             | 0.001          |
| MRA_RS11785  | Rv2222c           | <i>glnA2</i>     | -1.54             | 0.001          |
| MRA_RS07405  | Rv0491            | <i>regX3</i>     | -1.59             | 0.001          |
| MRA_RS09970  | Rv1884c           | <i>rpfC</i>      | -1.62             | 0.001          |

| <b>Ra_ID</b> | <b>Probe Name</b> | <b>Gene Name</b> | <b>GeoMean_1D</b> | <b>P-Value</b> |
|--------------|-------------------|------------------|-------------------|----------------|
| MRA_RS16620  | Rv3127            | <i>Rv3127</i>    | -1.95             | 0.001          |
| MRA_RS03605  | Rv0683            | <i>rpsG</i>      | -1.77             | 0.002          |
| MRA_RS09520  | Rv1794            | <i>Rv1794</i>    | -2.13             | 0.002          |
| MRA_RS13005  | Rv2442c           | <i>rplU</i>      | -1.98             | 0.002          |
| MRA_RS13080  | Rv2457c           | <i>clpX</i>      | -2.38             | 0.002          |
| MRA_RS15865  | Rv2986c           | <i>hupB</i>      | -1.79             | 0.002          |
| MRA_RS06930  | Rv3248c           | <i>sahH</i>      | -1.61             | 0.002          |
| MRA_RS00930  | Rv0171            | <i>mce1C</i>     | -1.94             | 0.002          |
| MRA_RS09950  | Rv1195            | <i>pe13</i>      | -1.86             | 0.002          |
| MRA_RS02535  | Rv0483            | <i>lprQ</i>      | -2.25             | 0.002          |
| MRA_RS07235  | Rv1360            | <i>Rv1360</i>    | -2.39             | 0.002          |
| MRA_RS17445  | Rv3280            | <i>accD5</i>     | -2.08             | 0.002          |
|              | MTB000008         | <i>trpT</i>      | -1.90             | 0.002          |
| MRA_RS18155  | Rv3418c           | <i>groES</i>     | -1.56             | 0.002          |
| MRA_RS11910  | Rv2243            | <i>fabD</i>      | -2.07             | 0.002          |
| MRA_RS03670  | Rv0695            | <i>Rv0695</i>    | -1.79             | 0.003          |
| MRA_RS04310  | Rv1197            | <i>esxK</i>      | -2.05             | 0.003          |
| MRA_RS16215  | Rv3049c           | <i>Rv3049c</i>   | -1.53             | 0.003          |
| MRA_RS16645  | Rv3131            | <i>Rv3131</i>    | -1.76             | 0.003          |
| MRA_RS03795  | Rv0719            | <i>rplF</i>      | -2.13             | 0.003          |
| MRA_RS09910  | Rv1872c           | <i>lldD2</i>     | -2.28             | 0.004          |
| MRA_RS00920  | Rv0169            | <i>mce1A</i>     | -1.96             | 0.002          |



| <b>Ra_ID</b> | <b>Probe Name</b> | <b>Gene Name</b> | <b>GeoMean_1D</b> | <b>P-Value</b> |
|--------------|-------------------|------------------|-------------------|----------------|
| MRA_RS09625  | Rv1815            | <i>Rv1815</i>    | -2.86             | 0.003          |
| MRA_RS03735  | Rv0707            | <i>rpsC</i>      | -1.68             | 0.003          |
| MRA_RS08460  | Rv0928            | <i>pstS3</i>     | -1.52             | 0.003          |
| MRA_RS12160  | Rv2293c           | <i>Rv2293c</i>   | -1.53             | 0.004          |
| MRA_RS15125  | Rv2846c           | <i>efpA</i>      | -1.58             | 0.004          |
| MRA_RS20780  | Rv3922c           | <i>Rv3922c</i>   | -2.04             | 0.004          |
| MRA_RS19160  | Rv1594            | <i>nadA</i>      | -1.86             | 0.004          |
| MRA_RS14005  | Rv2628            | <i>Rv2628</i>    | -2.08             | 0.004          |
| MRA_RS03720  | Rv0704            | <i>rplB</i>      | -1.80             | 0.005          |
| MRA_RS19865  | Rv3749c           | <i>Rv3749c</i>   | -2.10             | 0.005          |
| MRA_RS03385  | Rv0640            | <i>rplK</i>      | -1.64             | 0.005          |
| MRA_RS11930  | Rv2247            | <i>accD6</i>     | -1.82             | 0.005          |
| MRA_RS09965  | Rv1883c           | <i>Rv1883c</i>   | -1.70             | 0.005          |
| MRA_RS02305  | Rv0440            | <i>groEL2</i>    | -1.70             | 0.005          |
| MRA_RS15095  | Rv2840c           | <i>Rv2840c</i>   | -2.73             | 0.005          |
| MRA_RS17055  | Rv0932c           | <i>pstS2</i>     | -1.84             | 0.005          |
| MRA_RS04355  | Rv0824c           | <i>desA1</i>     | -2.19             | 0.005          |
| MRA_RS10470  | Rv1981c           | <i>nrdF1</i>     | -1.67             | 0.004          |

| <b>Ra_ID</b> | <b>Probe Name</b> | <b>Gene Name</b> | <b>GeoMean_1D</b> | <b>P-Value</b> |
|--------------|-------------------|------------------|-------------------|----------------|
| MRA_RS03710  | Rv0702            | <i>rplD</i>      | -2.15             | 0.006          |
| MRA_RS18370  | Rv3460c           | <i>rpsM</i>      | -1.97             | 0.006          |
| MRA_RS19330  | Rv3648c           | <i>cspA</i>      | -2.34             | 0.006          |
| MRA_RS17390  | Rv3269            | <i>Rv3269</i>    | -1.77             | 0.006          |
| MRA_RS05835  | Rv1094            | <i>desA2</i>     | -2.01             | 0.006          |
| MRA_RS09195  | Rv1738            | <i>Rv1738</i>    | -2.73             | 0.006          |
| MRA_RS15430  | Rv2904c           | <i>rplS</i>      | -1.61             | 0.004          |
| MRA_RS03705  | Rv0701            | <i>rplC</i>      | -1.88             | 0.006          |
| MRA_RS03715  | Rv0703            | <i>rplW</i>      | -1.53             | 0.006          |
| MRA_RS03615  | Rv0685            | <i>Tuf</i>       | -1.71             | 0.006          |
| MRA_RS03610  | Rv0684            | <i>fusA1</i>     | -1.51             | 0.006          |
|              | Rv3874            | <i>esxB</i>      | -1.66             | 0.008          |
| MRA_RS07035  | Rv1322A           | <i>Rv1322A</i>   | -1.78             | 0.009          |
| MRA_RS18365  | Rv3459c           | <i>rpsK</i>      | -1.86             | 0.008          |
| MRA_RS20790  | Rv3924c           | <i>rpmH</i>      | -1.51             | 0.007          |
| MRA_RS16230  | Rv1196            | <i>ppe18</i>     | -1.77             | 0.007          |
| MRA_RS09905  | Rv1871c           | <i>Rv1871c</i>   | -2.05             | 0.007          |
| MRA_RS19195  | Rv3622c           | <i>pe32</i>      | -1.59             | 0.004          |
| MRA_RS13320  | Rv3281            | <i>Rv3281</i>    | -1.69             | 0.007          |
| MRA_RS12480  | Rv2348c           | <i>Rv2348c</i>   | -1.76             | 0.007          |
| MRA_RS08700  | Rv1642            | <i>rpmI</i>      | -1.73             | 0.010          |
| MRA_RS11485  | Rv2166c           | <i>Rv2166c</i>   | -1.57             | 0.010          |

| <b>Ra_ID</b> | <b>Probe Name</b> | <b>Gene Name</b> | <b>GeoMean_1D</b> | <b>P-Value</b> |
|--------------|-------------------|------------------|-------------------|----------------|
| MRA_RS03730  | Rv0706            | <i>rplV</i>      | -1.59             | 0.012          |
| MRA_RS10755  | Rv2031c           | <i>hspX</i>      | -1.80             | 0.013          |
| MRA_RS06275  | Rv1177            | <i>fdxC</i>      | -1.65             | 0.013          |
| MRA_RS11375  | Rv2145c           | <i>wag31</i>     | -1.64             | 0.013          |
| MRA_RS09900  | Rv1870c           | <i>Rv1870c</i>   | -1.64             | 0.011          |
| MRA_RS00005  | Rv0001            | <i>dnaA</i>      | -1.59             | 0.016          |
| MRA_RS06260  | Rv1174c           | <i>TB8.4</i>     | -1.51             | 0.014          |
| MRA_RS16640  | Rv3130c           | <i>Rv3130c</i>   | -1.62             | 0.014          |
| MRA_RS19870  | Rv3750c           | <i>Rv3750c</i>   | -1.63             | 0.019          |
|              | MTB000021         | <i>rrf</i>       | -1.55             | 0.017          |
| MRA_RS20400  | Rv3846            | <i>soda</i>      | -1.52             | 0.017          |
| MRA_RS03575  | Rv0677c           | <i>mmpS5</i>     | -1.91             | 0.018          |
| MRA_RS16060  | Rv3020c           | <i>esxS</i>      | -1.52             | 0.020          |
| MRA_RS20545  | Rv3875            | <i>esxA</i>      | -1.74             | 0.021          |
| MRA_RS08705  | Rv1643            | <i>rplT</i>      | -1.70             | 0.021          |
| MRA_RS05745  | Rv1080c           | <i>greA</i>      | -2.43             | 0.031          |
| MRA_RS18380  | Rv3462c           | <i>infA</i>      | -1.80             | 0.031          |
| MRA_RS20370  | Rv3841            | <i>bfrB</i>      | -2.44             | 0.026          |
| MRA_RS03655  | Rv0692            | <i>Rv0692</i>    | -2.01             | 0.027          |
| MRA_RS20205  | Rv0287            | <i>esxG</i>      | -1.92             | 0.028          |

**Table S7: Details of the primers used in Real Time PCR study**

| <b>Gene</b>   | <b>Primer Sequence <sup>a</sup></b>                 | <b>Amplicon<br/>Size (bp)</b> | <b>Annealing<br/>Temp<sup>b</sup>(°C)</b> |
|---------------|-----------------------------------------------------|-------------------------------|-------------------------------------------|
| <i>sigA</i>   | F: AAACCATCTGCTGGAAGCCA<br>R: CGGCCGGTGTAGCGC       | 160                           | 55                                        |
| <i>hspX</i>   | F: ATCCCGGCCACCTTCGACA<br>R: AGCACCTACCGGCAGCGACA   | 196                           | 55                                        |
| <i>rv0031</i> | F: AAGCCGATATCCAAGCCTGG<br>R: TTCCGAGTTGATGGGTGGC   | 108                           | 55                                        |
| <i>rv0633</i> | F: TGTTTATGGAGCCCCACGTC<br>R: AGCCGAAGTTCCACGACATC  | 166                           | 55                                        |
| <i>ctpG</i>   | F: GAGCACGCGAACACTATCAG<br>R: TCAGCAAACTCCGGAGAAT   | 164                           | 55                                        |
| <i>iniA</i>   | F: CAGGAATTCACCGAACCCGA<br>R: CAGGAATTCACCGAACCCGA  | 187                           | 60                                        |
| <i>rv2621</i> | F: GGAGACGATCGACCACTTGG<br>R: CCCGCATGATCCCTAAGTGG  | 167                           | 60                                        |
| <i>cysK2</i>  | F: ACCCTGACCGTGGATTTTGG<br>R: GTACACCTTACCAGCGAGGG  | 182                           | 60                                        |
| <i>rubA</i>   | F:GGTCTGCGACTACGTCTACGAC<br>R: TCGAAATCGACCTTCTCGCG | 132                           | 60                                        |
| <i>kas A</i>  | F: GGTCACCTCAAGGATCCGGT<br>R: GCTCTCGACAATCCTCTCGG  | 192                           | 60                                        |

<sup>a</sup>Primers were designed using the IDT (Integrated DNA Technology) primer designer software.

<sup>b</sup>Initial denaturation of 95°C for 4 minutes followed by 40 cycles of 94°C (30 seconds), primer specific annealing temp. (30 seconds), 72°C (30 seconds) and final extension of 10 minutes at 72°C were used for amplification of mentioned genes followed by melting curve analysis.

**Figure S1: Venn diagram representing number of genes overlapping at different time points in nitrite treated *M. tuberculosis* cells. Overlapping genes A) down regulated and B) up regulated in nitrite treated *M. tuberculosis* cells at day1, 3 and 6 respectively.**

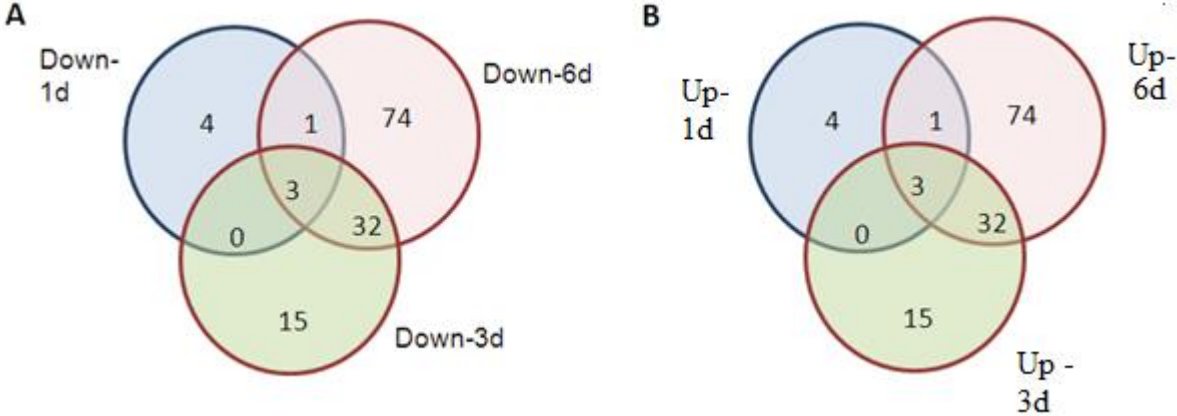

**Figure S2: Standardization of live- dead analysis assay.**

The cells were stained with SYTO9/ PI and observed under fluorescence microscope at 60X objective (EVOS, Invitrogen). It was observed that, log phase cells fluoresces green due to SYTO 9 staining (100% live) (Figure S1- A). While isopropanol treated cells, fluoresces yellow due to both SYTO 9 and PI staining (100% killed) (Figure S1- B). The scale bar corresponds to 50µm. Further, for the percent viability detection, a standard curve was drawn by spiking log phase cells with isopropanol treated cells in different ratio (1:0, 1:3, 1:1, 3:1 and 0:1) (Figure S1- C). The percent viability of nitrite treated and untreated cells were determined at different time intervals by using standard curve.

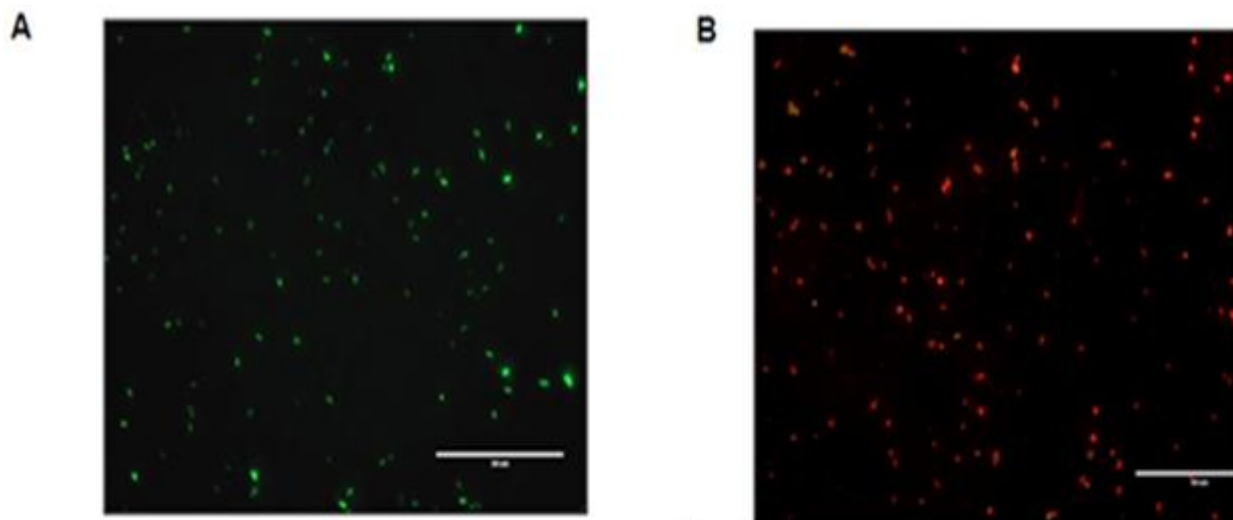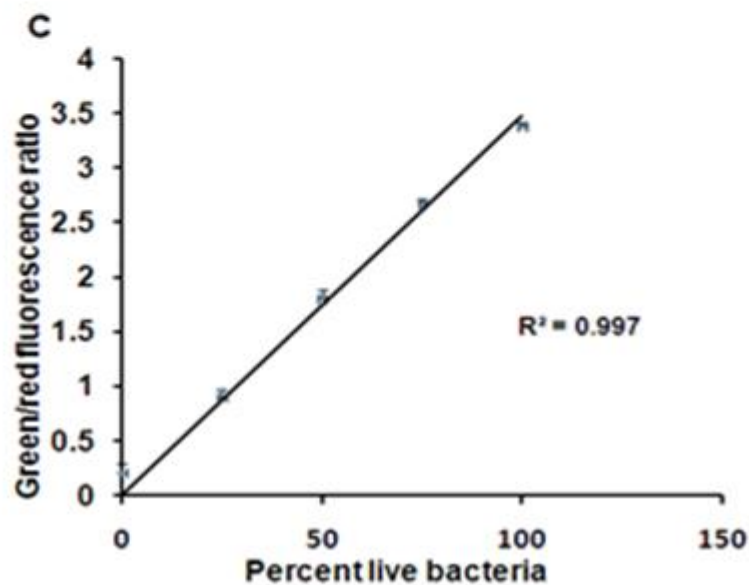

**Figure S3: Live-dead analysis for isoniazid treatment.** Log-phase cells were grown in *M.phlei* medium up to the optical density 0.2 (620 nm) and treated with Isoniazid (10 $\mu$ g/ml). The samples (200 $\mu$ l) were incubated with SYTO 9 (5.1 $\mu$ M) and PI (80 $\mu$ M) for 15mins. The fluorescence images were taken on different day like 0day, 1day, 3day, 6day and 10day by using the EVOS microscope (Life technology, Germany) (Figure S3).

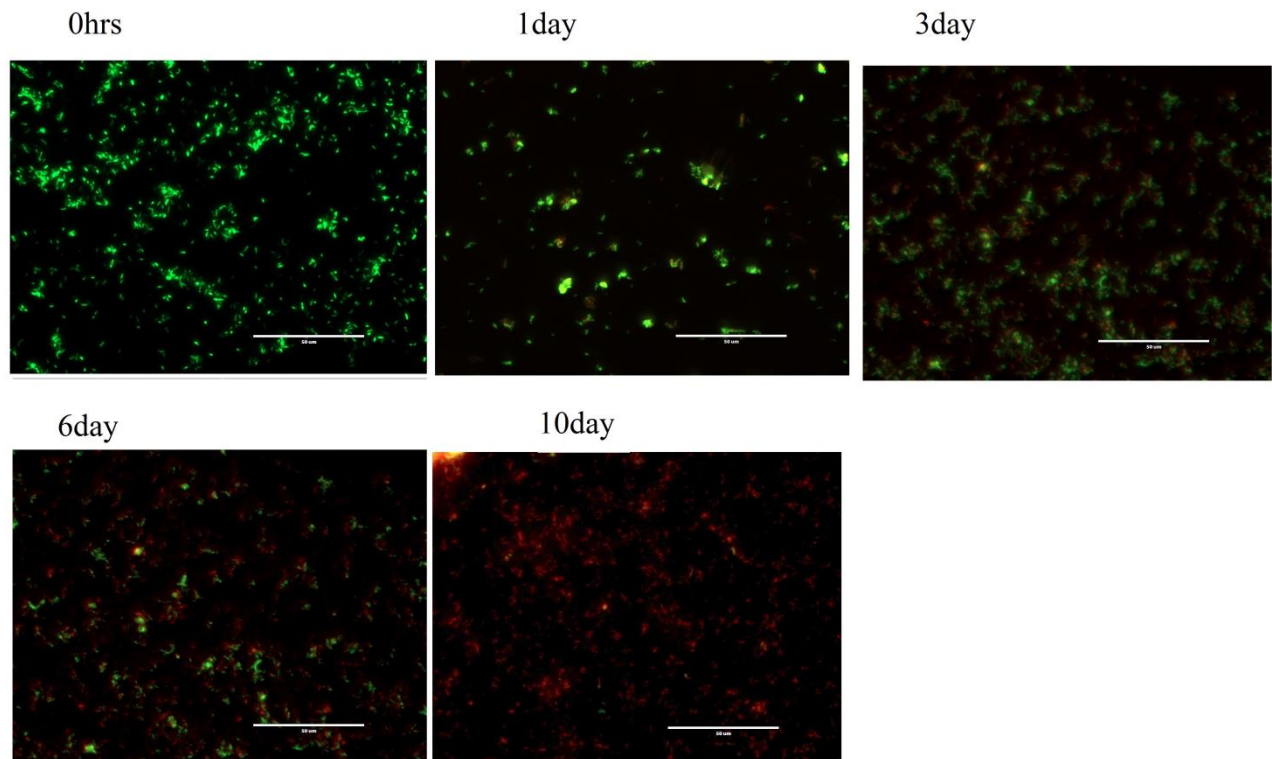

Supplement: 41598_2019_45652_MOESM1_ESM.pdf [file 41598_2019_45652_MOESM1_ESM.pdf]
